# Supplementary material
Source: PubMed Central journal article supplement (PMC4662883)
Supplement: NIHMS713388-supplement.pdf [file NIHMS713388-supplement.pdf]

**Supplemental File 1.** The genes in column A were identified as significantly differently expressed between C59 treated and control axolotl embryos and between Wnt-inhibited and control zebrafish (Wehner et al 2014). The number 1 references the experimental treatments in the zebrafish study where genes were identified as significant.

**Treatments from the zebrafish microarray experiment**

|          | <b>axin1 vs wt<br/>6 hpa single</b> | <b>dkk1 vs wt<br/>6hpa single</b> | <b>axin vs wt<br/>48 hpa</b> | <b>dkk1 vs wt<br/>48 hpa</b> | <b>axin vs wt<br/>48 hours</b> | <b>dkk1 vs wt<br/>48 hours</b> | <b>axin vs wt<br/>96 hours</b> | <b>dkk vs wt<br/>96 hours</b> |
|----------|-------------------------------------|-----------------------------------|------------------------------|------------------------------|--------------------------------|--------------------------------|--------------------------------|-------------------------------|
| ETV4     | 1                                   | 1                                 | 1                            | 1                            | 1                              | 1                              | 1                              | 1                             |
| FN1      | 1                                   | 1                                 | 1                            | 1                            | 1                              | 1                              | 1                              | 1                             |
| HMGB3    | 1                                   | 1                                 | 1                            | 1                            | 1                              | 1                              | 1                              | 1                             |
| TNC      | 1                                   | 1                                 | 1                            | 1                            | 1                              | 1                              | 1                              | 1                             |
| ADIPOQ   | 1                                   | 1                                 | 1                            | 1                            | 1                              |                                |                                | 1                             |
| B2M      | 1                                   | 1                                 | 1                            | 1                            | 1                              |                                |                                | 1                             |
| BMP7     | 1                                   |                                   |                              | 1                            | 1                              | 1                              | 1                              | 1                             |
| BNIP3    | 1                                   | 1                                 | 1                            | 1                            | 1                              | 1                              |                                |                               |
| BTBD6    |                                     |                                   | 1                            | 1                            | 1                              | 1                              | 1                              | 1                             |
| CRABP1   | 1                                   |                                   |                              | 1                            | 1                              | 1                              | 1                              | 1                             |
| CXCL12   | 1                                   | 1                                 | 1                            | 1                            | 1                              |                                |                                | 1                             |
| HOXA13   | 1                                   | 1                                 | 1                            |                              |                                | 1                              | 1                              | 1                             |
| HYOU1    |                                     |                                   | 1                            | 1                            | 1                              | 1                              | 1                              | 1                             |
| ID1      | 1                                   | 1                                 | 1                            | 1                            | 1                              |                                |                                | 1                             |
| KAL1     | 1                                   | 1                                 | 1                            | 1                            | 1                              |                                |                                | 1                             |
| KIF26B   | 1                                   | 1                                 | 1                            |                              |                                | 1                              | 1                              | 1                             |
| LAMB1    | 1                                   | 1                                 | 1                            | 1                            | 1                              | 1                              |                                |                               |
| LEF1     | 1                                   |                                   |                              | 1                            | 1                              | 1                              | 1                              | 1                             |
| LFNG     | 1                                   |                                   |                              | 1                            | 1                              | 1                              | 1                              | 1                             |
| SERPINH1 | 1                                   | 1                                 | 1                            | 1                            | 1                              | 1                              |                                |                               |
| STMN1    | 1                                   | 1                                 |                              |                              | 1                              | 1                              | 1                              | 1                             |
| SVIL     | 1                                   | 1                                 |                              |                              | 1                              | 1                              | 1                              | 1                             |
| VCAN     | 1                                   | 1                                 | 1                            | 1                            | 1                              |                                |                                | 1                             |
| ANXA1    | 1                                   | 1                                 | 1                            | 1                            |                                |                                |                                | 1                             |
| CCNB1    | 1                                   | 1                                 | 1                            |                              |                                |                                | 1                              | 1                             |

|         |   |   |   |   |   |   |   |   |
|---------|---|---|---|---|---|---|---|---|
| CKAP4   | 1 | 1 | 1 | 1 |   |   |   | 1 |
| CKM     | 1 | 1 | 1 |   |   |   | 1 | 1 |
| DHRS13  | 1 | 1 | 1 | 1 |   |   |   | 1 |
| DUSP6   | 1 | 1 | 1 | 1 |   |   |   | 1 |
| EGFL6   | 1 | 1 |   |   |   | 1 | 1 | 1 |
| FHL1    | 1 | 1 | 1 | 1 | 1 |   |   |   |
| GADD45G | 1 | 1 | 1 | 1 |   |   |   | 1 |
| HPGD    | 1 | 1 | 1 | 1 |   |   |   | 1 |
| INHBB   |   |   |   | 1 | 1 | 1 | 1 | 1 |
| LMO4    | 1 | 1 | 1 | 1 |   |   |   | 1 |
| NET1    | 1 | 1 | 1 | 1 |   |   |   | 1 |
| PARP6   | 1 | 1 | 1 | 1 |   |   |   | 1 |
| PLTP    | 1 | 1 | 1 | 1 |   |   |   | 1 |
| RASL11B | 1 | 1 | 1 | 1 |   |   |   | 1 |
| RND3    | 1 | 1 | 1 | 1 |   |   |   | 1 |
| ROBO1   | 1 | 1 | 1 | 1 |   |   |   | 1 |
| RTN1    | 1 | 1 | 1 | 1 |   |   |   | 1 |
| SST     | 1 | 1 | 1 | 1 |   |   |   | 1 |
| TGIF1   | 1 | 1 | 1 | 1 |   |   |   | 1 |
| TNFSF10 | 1 | 1 | 1 | 1 |   |   |   | 1 |
| TSHZ2   |   |   |   | 1 | 1 | 1 | 1 | 1 |
| ADSSL1  | 1 | 1 | 1 | 1 |   |   |   |   |
| ANGPTL7 | 1 | 1 | 1 | 1 |   |   |   |   |
| CAT     | 1 | 1 | 1 | 1 |   |   |   |   |
| CCNB2   | 1 | 1 | 1 | 1 |   |   |   |   |
| DAAM1   |   |   | 1 | 1 | 1 |   |   | 1 |
| DST     | 1 | 1 | 1 |   |   |   |   | 1 |
| FLNA    | 1 | 1 |   |   |   |   | 1 | 1 |
| FYN     | 1 | 1 | 1 | 1 |   |   |   |   |
| HEBP2   |   |   | 1 | 1 | 1 | 1 |   |   |
| HSPA5   |   |   | 1 | 1 | 1 | 1 |   |   |
| HSPD1   | 1 | 1 |   |   | 1 | 1 |   |   |
| KIF11   | 1 | 1 |   |   |   |   | 1 | 1 |
| KRT18   | 1 | 1 | 1 |   |   | 1 |   |   |

|          |   |   |   |   |   |   |   |   |
|----------|---|---|---|---|---|---|---|---|
| LMNB2    | 1 | 1 | 1 | 1 |   |   |   |   |
| MARCKS   | 1 | 1 | 1 |   |   | 1 |   |   |
| MMP14    | 1 | 1 | 1 | 1 |   |   |   |   |
| MSX2     | 1 |   |   | 1 | 1 |   |   | 1 |
| NUF2     | 1 | 1 | 1 | 1 |   |   |   |   |
| OGN      | 1 | 1 | 1 | 1 |   |   |   |   |
| PCP4     | 1 | 1 |   |   |   |   | 1 | 1 |
| PLK1     | 1 | 1 | 1 | 1 |   |   |   |   |
| RANBP1   | 1 | 1 | 1 |   |   |   |   | 1 |
| RARG     | 1 |   |   | 1 | 1 |   |   | 1 |
| RASAL2   | 1 | 1 | 1 |   |   |   |   | 1 |
| RBP4     | 1 | 1 | 1 |   |   | 1 |   |   |
| SALL1    |   |   | 1 | 1 |   |   | 1 | 1 |
| SUZ12    | 1 | 1 | 1 | 1 |   |   |   |   |
| TGFB1    | 1 | 1 | 1 | 1 |   |   |   |   |
| TMPO     | 1 |   |   |   |   | 1 | 1 | 1 |
| TNFRSF6B | 1 | 1 |   |   |   |   | 1 | 1 |
| ACTA2    | 1 | 1 |   |   |   | 1 |   |   |
| ANGPTL2  | 1 | 1 | 1 |   |   |   |   |   |
| ATP6V1B2 | 1 | 1 | 1 |   |   |   |   |   |
| AURKA    | 1 | 1 | 1 |   |   |   |   |   |
| BCAN     | 1 | 1 | 1 |   |   |   |   |   |
| C9orf3   | 1 | 1 |   |   |   |   |   | 1 |
| CKS1B    | 1 | 1 | 1 |   |   |   |   |   |
| COL5A1   | 1 | 1 | 1 |   |   |   |   |   |
| CXCR4    | 1 | 1 |   |   |   |   |   | 1 |
| CYP26A1  | 1 | 1 |   |   |   |   |   | 1 |
| CYR61    | 1 | 1 |   |   |   |   |   | 1 |
| DCK      | 1 | 1 |   |   |   |   |   | 1 |
| DIXDC1   |   |   |   |   |   | 1 | 1 | 1 |
| DUPD1    | 1 | 1 |   |   |   |   |   | 1 |
| EIF4G1   |   |   | 1 | 1 |   |   |   | 1 |
| EMILIN1  | 1 |   |   | 1 |   |   |   | 1 |
| EMX2     | 1 |   |   | 1 |   |   |   | 1 |

|          |   |   |   |   |   |   |   |   |
|----------|---|---|---|---|---|---|---|---|
| ESCO2    | 1 | 1 |   |   |   |   |   | 1 |
| FEN1     | 1 |   |   |   |   |   | 1 | 1 |
| FREM2    |   |   |   |   |   | 1 | 1 | 1 |
| GAP43    |   |   |   |   |   | 1 | 1 | 1 |
| GINS2    | 1 | 1 |   |   |   |   |   | 1 |
| GINS3    |   |   | 1 | 1 |   |   |   | 1 |
| HSPB1    | 1 | 1 |   |   |   |   |   | 1 |
| ILF2     |   |   |   |   |   | 1 | 1 | 1 |
| KEAP1    | 1 | 1 |   |   |   |   |   | 1 |
| KIF15    | 1 | 1 |   |   |   |   |   | 1 |
| LMAN1    |   |   |   | 1 | 1 | 1 |   |   |
| MBP      |   |   |   |   |   | 1 | 1 | 1 |
| MCM6     | 1 | 1 |   |   |   |   |   | 1 |
| MKI67    | 1 | 1 |   |   |   | 1 |   |   |
| MYCN     | 1 | 1 |   |   |   |   |   | 1 |
| MYH13    | 1 | 1 |   |   |   |   |   | 1 |
| NAPEPLD  |   |   |   |   |   | 1 | 1 | 1 |
| NASP     | 1 | 1 |   |   |   |   |   | 1 |
| OLFM2    | 1 | 1 |   |   | 1 |   |   |   |
| PAPSS2   | 1 | 1 |   |   |   |   |   | 1 |
| PARP1    | 1 | 1 |   |   |   |   |   | 1 |
| PDGFRL   | 1 | 1 |   |   |   |   |   | 1 |
| PLOD1    |   |   |   |   |   | 1 | 1 | 1 |
| PRDM1    |   |   | 1 | 1 |   |   |   | 1 |
| PRICKLE1 | 1 |   |   | 1 |   |   |   | 1 |
| PRIM1    | 1 | 1 |   |   |   |   |   | 1 |
| PRRX1    | 1 | 1 |   |   |   |   |   | 1 |
| RAD51    | 1 | 1 |   |   |   |   |   | 1 |
| RHOA     | 1 | 1 | 1 |   |   |   |   |   |
| RRM1     | 1 | 1 |   |   | 1 |   |   |   |
| RRM2     | 1 | 1 | 1 |   |   |   |   |   |
| SEMA3D   | 1 | 1 |   |   |   |   |   | 1 |
| SESN3    |   |   | 1 | 1 |   |   |   | 1 |
| SFRP1    | 1 | 1 | 1 |   |   |   |   |   |

|          |   |   |   |   |   |   |   |   |
|----------|---|---|---|---|---|---|---|---|
| SLC39A7  |   |   |   | 1 |   |   | 1 | 1 |
| SMAD3    | 1 | 1 | 1 |   |   |   |   |   |
| SNAP25   |   |   | 1 | 1 | 1 |   |   |   |
| STMN4    | 1 | 1 |   |   |   |   |   | 1 |
| SULF1    |   |   | 1 | 1 |   |   |   | 1 |
| TNFRSF21 |   |   | 1 | 1 |   |   |   | 1 |
| TPX2     | 1 | 1 |   |   |   | 1 |   |   |
| TUBB     | 1 | 1 |   |   |   | 1 |   |   |
| WIF1     |   |   | 1 | 1 |   |   |   | 1 |
| ALDOA    |   |   | 1 | 1 |   |   |   |   |
| ARL11    |   |   |   |   | 1 | 1 |   |   |
| ASPM     | 1 | 1 |   |   |   |   |   |   |
| ATP2A2   | 1 | 1 |   |   |   |   |   |   |
| ATP6VOD1 | 1 | 1 |   |   |   |   |   |   |
| ATP6V1A  |   |   | 1 |   |   |   |   | 1 |
| BIRC5    |   |   | 1 | 1 |   |   |   |   |
| BMP2     |   |   | 1 | 1 |   |   |   |   |
| CCNA2    | 1 | 1 |   |   |   |   |   |   |
| CCNB3    | 1 | 1 |   |   |   |   |   |   |
| CDC20    | 1 | 1 |   |   |   |   |   |   |
| CDCA8    | 1 | 1 |   |   |   |   |   |   |
| CENPE    | 1 | 1 |   |   |   |   |   |   |
| CHAF1A   | 1 |   |   |   |   | 1 |   |   |
| CHST2    | 1 |   |   |   |   |   |   | 1 |
| CHSY1    |   |   |   |   |   |   | 1 | 1 |
| CPT1A    | 1 |   |   |   |   |   |   | 1 |
| CRABP2   | 1 |   |   |   |   |   |   | 1 |
| CRIP1    | 1 | 1 |   |   |   |   |   |   |
| CTGF     | 1 | 1 |   |   |   |   |   |   |
| CTHRC1   |   |   |   | 1 | 1 |   |   |   |
| CYP26B1  | 1 |   |   |   |   |   |   | 1 |
| DDX27    | 1 | 1 |   |   |   |   |   |   |
| DHRS3    | 1 |   |   |   |   |   |   | 1 |
| DLGAP5   | 1 | 1 |   |   |   |   |   |   |

|          |   |   |   |   |   |   |   |   |
|----------|---|---|---|---|---|---|---|---|
| DNASE1L1 | 1 |   |   | 1 |   |   |   |   |
| DSCC1    | 1 |   |   |   |   |   |   | 1 |
| EFEMP1   |   |   |   |   | 1 | 1 |   |   |
| EGFLAM   |   |   | 1 |   |   |   |   | 1 |
| EGR1     | 1 | 1 |   |   |   |   |   |   |
| ENOSF1   |   |   |   | 1 |   |   |   | 1 |
| ENTPD2   | 1 | 1 |   |   |   |   |   |   |
| EXO1     |   |   |   |   |   |   | 1 | 1 |
| FLNC     | 1 |   |   | 1 |   |   |   |   |
| FOS      | 1 | 1 |   |   |   |   |   |   |
| GATM     |   |   | 1 |   |   | 1 |   |   |
| GCDH     | 1 | 1 |   |   |   |   |   |   |
| GLUL     | 1 | 1 |   |   |   |   |   |   |
| GOSR2    | 1 |   |   |   |   |   |   | 1 |
| hgd      |   |   |   | 1 |   |   |   | 1 |
| HIBCH    |   |   |   | 1 |   |   |   | 1 |
| HMMR     | 1 | 1 |   |   |   |   |   |   |
| HSPB8    | 1 |   |   | 1 |   |   |   |   |
| HTRA1    |   |   | 1 | 1 |   |   |   |   |
| IFRD2    | 1 | 1 |   |   |   |   |   |   |
| IGF2BP3  | 1 | 1 |   |   |   |   |   |   |
| KDEL3    | 1 | 1 |   |   |   |   |   |   |
| KIF22    | 1 | 1 |   |   |   |   |   |   |
| KIF23    | 1 | 1 |   |   |   |   |   |   |
| KIFC1    | 1 | 1 |   |   |   |   |   |   |
| LEMD3    | 1 |   |   | 1 |   |   |   |   |
| LMO7     | 1 |   |   |   |   |   |   | 1 |
| LRRC20   |   |   |   |   |   |   | 1 | 1 |
| LTA4H    | 1 | 1 |   |   |   |   |   |   |
| MAD2L1   | 1 | 1 |   |   |   |   |   |   |
| MXI1     |   |   | 1 |   |   | 1 |   |   |
| NDRG1    | 1 |   |   |   |   |   |   | 1 |
| NFIL3    | 1 | 1 |   |   |   |   |   |   |
| NHSL1    | 1 | 1 |   |   |   |   |   |   |

|         |   |   |   |   |   |   |  |   |
|---------|---|---|---|---|---|---|--|---|
| NT5C3   | 1 |   |   | 1 |   |   |  |   |
| NUPR1   |   |   | 1 |   |   |   |  | 1 |
| NUSAP1  | 1 | 1 |   |   |   |   |  |   |
| PKIG    |   |   | 1 | 1 |   |   |  |   |
| PLK4    |   |   |   |   | 1 | 1 |  |   |
| POLA2   | 1 | 1 |   |   |   |   |  |   |
| PRC1    | 1 | 1 |   |   |   |   |  |   |
| QDPR    | 1 | 1 |   |   |   |   |  |   |
| RAB34   | 1 | 1 |   |   |   |   |  |   |
| RAB3IP  | 1 | 1 |   |   |   |   |  |   |
| RHOT1   | 1 | 1 |   |   |   |   |  |   |
| RPS6KA3 | 1 | 1 |   |   |   |   |  |   |
| SART3   | 1 | 1 |   |   |   |   |  |   |
| SCIN    |   |   | 1 | 1 |   |   |  |   |
| SEC23A  | 1 |   |   | 1 |   |   |  |   |
| SEMA5A  |   |   |   | 1 |   |   |  | 1 |
| SFRP2   |   |   | 1 |   |   |   |  | 1 |
| SLC16A9 |   |   | 1 |   |   |   |  | 1 |
| SLC7A3  | 1 |   |   |   |   |   |  | 1 |
| SMAD7   | 1 |   |   | 1 |   |   |  |   |
| SNTB1   | 1 | 1 |   |   |   |   |  |   |
| SPC25   | 1 | 1 |   |   |   |   |  |   |
| SPOCK3  | 1 |   |   |   |   |   |  | 1 |
| SPON2   |   |   | 1 |   |   |   |  | 1 |
| TACC3   | 1 | 1 |   |   |   |   |  |   |
| TAGLN   |   |   |   |   | 1 | 1 |  |   |
| TAPBPL  | 1 |   |   |   |   |   |  | 1 |
| TNNI2   | 1 | 1 |   |   |   |   |  |   |
| TNNT3   | 1 | 1 |   |   |   |   |  |   |
| TRIM63  | 1 | 1 |   |   |   |   |  |   |
| TTK     | 1 | 1 |   |   |   |   |  |   |
| TUBA1B  | 1 | 1 |   |   |   |   |  |   |
| TYMS    |   |   | 1 |   |   |   |  | 1 |
| UCHL1   |   |   |   | 1 | 1 |   |  |   |

|         |   |   |   |   |   |   |   |
|---------|---|---|---|---|---|---|---|
| UCK2    | 1 |   |   | 1 |   |   |   |
| UGDH    | 1 |   |   |   |   | 1 |   |
| VRK1    | 1 |   |   |   |   |   | 1 |
| Wnt5a   | 1 |   |   |   |   |   | 1 |
| YARS    | 1 | 1 |   |   |   |   |   |
| ZMYND19 |   |   |   |   | 1 | 1 |   |
| ABAT    |   |   | 1 |   |   |   |   |
| ABCA1   | 1 |   |   |   |   |   |   |
| ACPL2   |   |   |   |   |   |   | 1 |
| ACSBG2  | 1 |   |   |   |   |   |   |
| ADCYAP1 |   |   |   |   |   |   | 1 |
| AK1     |   |   |   |   |   |   | 1 |
| ANP32E  |   |   |   |   |   |   | 1 |
| APEX1   |   |   |   |   |   | 1 |   |
| APRT    |   |   |   |   |   |   | 1 |
| ARF1    |   |   |   |   |   |   | 1 |
| ARF3    |   |   |   |   |   |   | 1 |
| ATF5    |   |   |   |   |   | 1 |   |
| axin1   |   |   |   |   |   |   | 1 |
| BCO2    | 1 |   |   |   |   |   |   |
| C3orf54 | 1 |   |   |   |   |   |   |
| CALB2   |   |   |   |   |   |   | 1 |
| CALU    |   |   |   |   |   | 1 |   |
| CAMK2D  |   |   |   | 1 |   |   |   |
| CCDC80  |   |   |   | 1 |   |   |   |
| CDC27   | 1 |   |   |   |   |   |   |
| CDC6    | 1 |   |   |   |   |   |   |
| CDCA5   |   |   | 1 |   |   |   |   |
| CDK7    |   |   |   | 1 |   |   |   |
| CDX4    |   |   |   |   |   | 1 |   |
| CENPF   | 1 |   |   |   |   |   |   |
| CENPM   |   |   | 1 |   |   |   |   |
| COL21A1 |   |   |   |   |   |   | 1 |
| COPB2   |   |   | 1 |   |   |   |   |



|          |   |  |   |  |   |  |   |
|----------|---|--|---|--|---|--|---|
| COQ10B   |   |  | 1 |  |   |  |   |
| CTH      | 1 |  |   |  |   |  |   |
| DCN      |   |  |   |  | 1 |  |   |
| DEPDC7   |   |  | 1 |  |   |  |   |
| DES      |   |  | 1 |  |   |  |   |
| DLGAP4   |   |  |   |  |   |  | 1 |
| DMXL2    |   |  | 1 |  |   |  |   |
| DNAJC9   |   |  |   |  |   |  | 1 |
| DRAP1    |   |  |   |  |   |  | 1 |
| E2F3     | 1 |  |   |  |   |  |   |
| EIF4EBP3 |   |  |   |  |   |  | 1 |
| ELOVL6   |   |  |   |  |   |  | 1 |
| ENPP1    |   |  |   |  |   |  | 1 |
| EXOSC2   |   |  | 1 |  |   |  |   |
| FAM20C   |   |  |   |  |   |  | 1 |
| FBXW11   |   |  |   |  | 1 |  |   |
| FBXW5    |   |  | 1 |  |   |  |   |
| FERMT1   |   |  |   |  |   |  | 1 |
| FOXK1    |   |  |   |  |   |  | 1 |
| FZD8     | 1 |  |   |  |   |  |   |
| GAMT     |   |  |   |  |   |  | 1 |
| GIN54    |   |  |   |  |   |  | 1 |
| GPD1     | 1 |  |   |  |   |  |   |
| GPR143   |   |  |   |  |   |  | 1 |
| GPR182   |   |  |   |  |   |  | 1 |
| GTSE1    |   |  |   |  | 1 |  |   |
| HAPLN3   |   |  |   |  | 1 |  |   |
| HAUS8    |   |  |   |  |   |  | 1 |
| HCFC1    |   |  |   |  |   |  | 1 |
| HEATR3   | 1 |  |   |  |   |  |   |
| HELLS    |   |  |   |  |   |  | 1 |
| HEXB     | 1 |  |   |  |   |  |   |
| HNRNPM   | 1 |  |   |  |   |  |   |
| HOXA3    |   |  |   |  |   |  | 1 |

|          |   |  |   |   |  |   |  |   |
|----------|---|--|---|---|--|---|--|---|
| ID3      |   |  |   |   |  |   |  | 1 |
| IL1B     | 1 |  |   |   |  |   |  |   |
| INCENP   |   |  | 1 |   |  |   |  |   |
| IRF1     | 1 |  |   |   |  |   |  |   |
| ITGB1BP3 |   |  |   |   |  |   |  | 1 |
| ITGBL1   |   |  |   |   |  |   |  | 1 |
| JAG1     |   |  |   |   |  |   |  | 1 |
| KBTBD10  | 1 |  |   |   |  |   |  |   |
| KIAA0182 |   |  |   |   |  |   |  | 1 |
| KIAA1715 | 1 |  |   |   |  |   |  |   |
| KIF2C    |   |  |   |   |  | 1 |  |   |
| LAMA5    |   |  |   |   |  |   |  | 1 |
| LBR      |   |  |   |   |  | 1 |  |   |
| LDB3     |   |  |   | 1 |  |   |  |   |
| LEPRE1   |   |  | 1 |   |  |   |  |   |
| LPAR1    |   |  |   |   |  | 1 |  |   |
| LPIN1    |   |  |   |   |  |   |  | 1 |
| MCM4     | 1 |  |   |   |  |   |  |   |
| MLL5     |   |  |   |   |  |   |  | 1 |
| MMD      |   |  | 1 |   |  |   |  |   |
| MPV17    |   |  | 1 |   |  |   |  |   |
| MRE11A   | 1 |  |   |   |  |   |  |   |
| MTFR1    | 1 |  |   |   |  |   |  |   |
| MYL4     | 1 |  |   |   |  |   |  |   |
| NOLC1    |   |  |   |   |  |   |  | 1 |
| NPPC     |   |  |   |   |  |   |  | 1 |
| NR2F1    |   |  |   | 1 |  |   |  |   |
| NSMCE1   | 1 |  |   |   |  |   |  |   |
| NTF3     | 1 |  |   |   |  |   |  |   |
| NUCKS1   |   |  | 1 |   |  |   |  |   |
| NUP210   |   |  |   |   |  | 1 |  |   |
| ODC1     |   |  |   |   |  |   |  | 1 |
| ONECUT2  | 1 |  |   |   |  |   |  |   |
| P4HA1    |   |  |   |   |  | 1 |  |   |

|          |   |  |   |   |  |   |  |   |
|----------|---|--|---|---|--|---|--|---|
| PABPC4   |   |  |   | 1 |  |   |  |   |
| PACSIN3  | 1 |  |   |   |  |   |  |   |
| PCNA     |   |  |   |   |  |   |  | 1 |
| PDZRN3   |   |  |   | 1 |  |   |  |   |
| PECR     | 1 |  |   |   |  |   |  |   |
| PIAS2    |   |  |   | 1 |  |   |  |   |
| PIK3R1   |   |  |   |   |  | 1 |  |   |
| PKM2     |   |  | 1 |   |  |   |  |   |
| PRICKLE2 |   |  |   | 1 |  |   |  |   |
| PRRC1    | 1 |  |   |   |  |   |  |   |
| PRSS23   |   |  |   |   |  |   |  | 1 |
| PVALB    | 1 |  |   |   |  |   |  |   |
| RBM14    | 1 |  |   |   |  |   |  |   |
| RBPMS    | 1 |  |   |   |  |   |  |   |
| RCAN1    |   |  |   | 1 |  |   |  |   |
| RCN1     |   |  |   |   |  | 1 |  |   |
| RCOR1    |   |  | 1 |   |  |   |  |   |
| RNASEH2A |   |  |   |   |  |   |  | 1 |
| RNF168   | 1 |  |   |   |  |   |  |   |
| RPA1     | 1 |  |   |   |  |   |  |   |
| RPL31    |   |  |   |   |  |   |  | 1 |
| RPS6KB1  |   |  | 1 |   |  |   |  |   |
| SALL4    |   |  |   |   |  |   |  | 1 |
| SASS6    | 1 |  |   |   |  |   |  |   |
| SH3GL2   |   |  |   | 1 |  |   |  |   |
| SHCBP1   |   |  | 1 |   |  |   |  |   |
| SLITRK6  | 1 |  |   |   |  |   |  |   |
| SNRPA1   |   |  |   |   |  |   |  | 1 |
| SPEN     |   |  |   |   |  |   |  | 1 |
| srsf4    |   |  |   |   |  |   |  | 1 |
| ST6GAL2  |   |  |   |   |  |   |  | 1 |
| STT3A    |   |  |   | 1 |  |   |  |   |
| SULF2    |   |  |   |   |  |   |  | 1 |
| TAGLN3   |   |  |   |   |  | 1 |  |   |

|          |   |  |   |  |   |   |  |   |
|----------|---|--|---|--|---|---|--|---|
| TAT      |   |  |   |  |   |   |  | 1 |
| TDG      | 1 |  |   |  |   |   |  |   |
| TEK      | 1 |  |   |  |   |   |  |   |
| THBS2    |   |  | 1 |  |   |   |  |   |
| TIMD4    | 1 |  |   |  |   |   |  |   |
| TM9SF3   | 1 |  |   |  |   |   |  |   |
| TMEM48   |   |  |   |  |   |   |  | 1 |
| TP53INP1 |   |  | 1 |  |   |   |  |   |
| TPM1     |   |  |   |  |   | 1 |  |   |
| TPM3     |   |  | 1 |  |   |   |  |   |
| TRABD    | 1 |  |   |  |   |   |  |   |
| TRIP13   |   |  |   |  |   |   |  | 1 |
| TSC22D3  |   |  |   |  |   |   |  | 1 |
| TWSG1    | 1 |  |   |  |   |   |  |   |
| UAP1     | 1 |  |   |  |   |   |  |   |
| UBE2S    |   |  |   |  |   |   |  | 1 |
| VEZF1    |   |  |   |  |   |   |  | 1 |
| WHSC1    | 1 |  |   |  |   |   |  |   |
| XIRP1    | 1 |  |   |  |   |   |  |   |
| YPEL3    |   |  | 1 |  |   |   |  |   |
| YWHAH    |   |  | 1 |  |   |   |  |   |
| ZFP36L2  |   |  |   |  | 1 |   |  |   |
